# Supplementary material for: Comparative Study of a Novel Lateral Flow Rapid Test with Conventional Serological Test Systems for the Diagnosis of Canine Leishmaniosis in Croatia and Brazil
Source: MDPI journal article supplement (doi:10.3390/pathogens13020109), 2024-01-26
Supplement: s1 [file s1]

**Supplemental Table S1.** Panel of canine sera from Croatia and Brazil that have been pre-examined for CVL by indicated tests and were used for re-evaluation by VetLine® ELISA, rKLi8.3 ELISA and LFT (INgezim® Leishma CROM) tests.

| Dogs                              | Region  | Diagnosis                                  | n   |
|-----------------------------------|---------|--------------------------------------------|-----|
| Symptomatic                       | Croatia | Leishmania Dipstick Rapydtest, Apacor/IFAT | 66  |
| Asymptomatic                      | Croatia | „                                          | 27  |
| Healthy endemic controls          | Croatia | „                                          | 88  |
| Other infection                   | Croatia | parasitological examination                | 51  |
| Symptomatic                       | Brazil  | parasitological examination/ DPP®          | 13  |
| Oligosymptomatic                  | Brazil  | parasitological examination/ DPP®          | 12  |
| Asymptomatic                      | Brazil  | parasitological examination/ DPP®          | 11  |
| Healthy endemic controls          | Brazil  | parasitological examination/ DPP®          | 16  |
| Healthy vaccinated                | Brazil  | parasitological examination/ DPP®          | 20  |
| <i>T. cruzi</i> infected (Chagas) | Brazil  | parasitological examination                | 40  |
| Total                             |         |                                            | 344 |

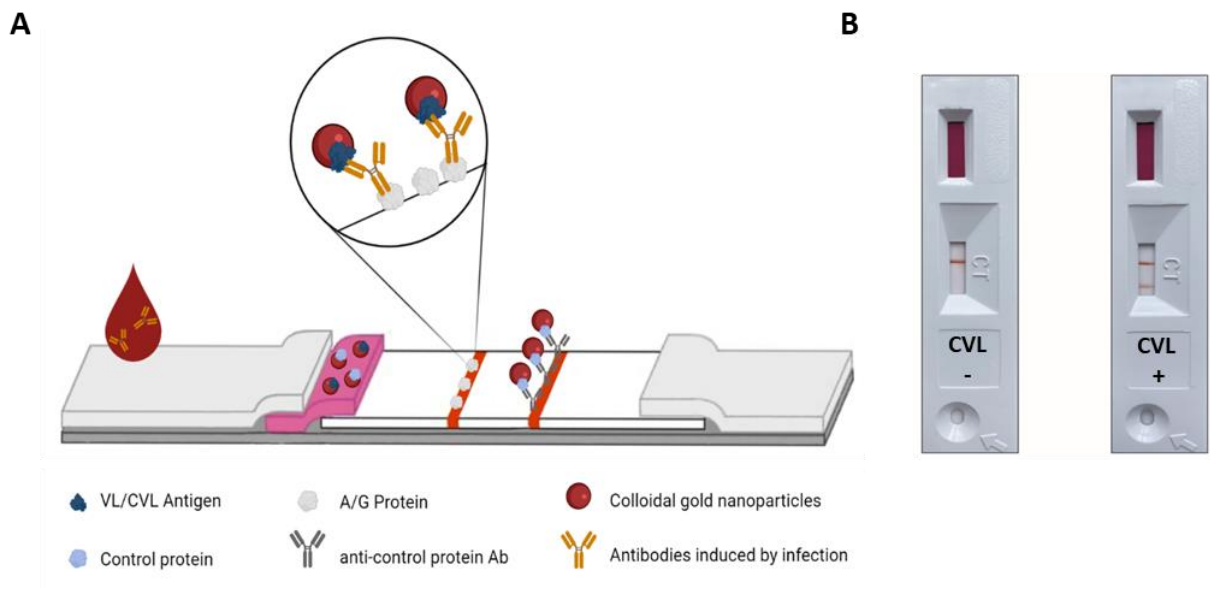

**Supplemental Figure S1.** A) Scheme of the lateral flow assay (INgezim® Leishma CROM, Spain) for the detection of antibodies to *Leishmania*. B) Representative result of LFT with negative and positive CVL sera.

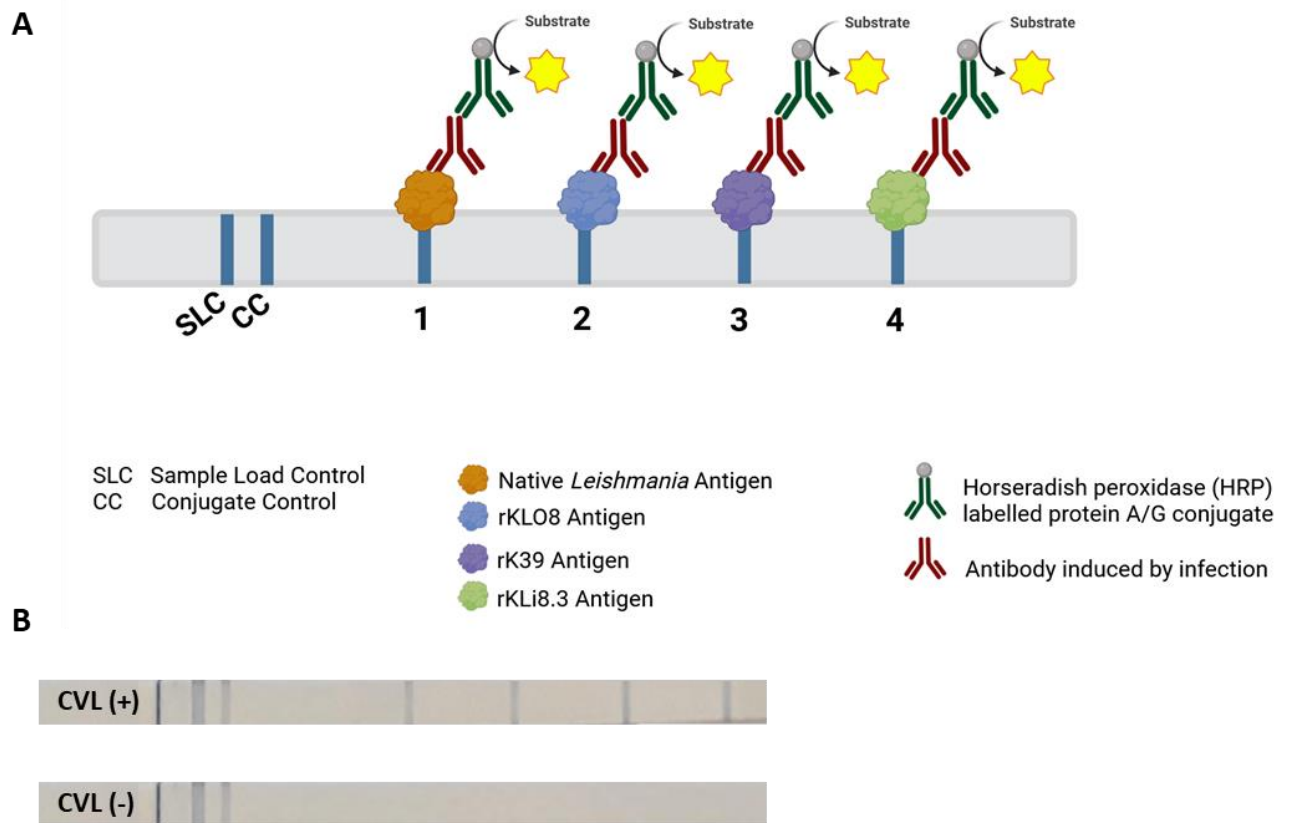

**Supplemental Figure S2.** A) Scheme of the VetBlot® *Leishmania* Lineblot for the detection of CanL antibodies. Line 1, native *Leishmania* antigen and line 2-4, recombinant antigens of *Leishmania* are printed onto a nitrocellulose membrane. B) Representative result of a lineblot with negative and positive CanL sera.

**Supplemental Table S2.** Comparison of CVL seropositivity by rKLi8.3 based LFT and ELISA and ELISAs based on other recombinant antigens.

|          | Animals | LFT | rKLi8.3 | rK28 | rK39 |
|----------|---------|-----|---------|------|------|
| Grupo AD | AD1     | -   | -       | -    | -    |
|          | AD2     | ND  | ND      | -    | +    |
|          | AD3     | -   | -       | -    | -    |
|          | AD4     | +   | +       | +    | +    |
|          | AD5     | -   | -       | +    | -    |
|          | AD6     | +   | +       | +    | +    |
|          | AD7     | +   | +       | +    | +    |
|          | AD8     | ND  | ND      | +    | +    |
|          | AD9     | +   | +       | +    | +    |
|          | AD10    | ND  | ND      | +    | +    |
|          | AD11    | +   | +       | +    | +    |
| Grupo OD | OD2     | -   | -       | -    | -    |
|          | OD3     | +   | +       | +    | +    |
|          | OD4     | +   | +       | +    | +    |
|          | OD5     | +   | +       | +    | +    |
|          | OD6     | +   | +       | +    | +    |
|          | OD7     | ND  | ND      | +    | +    |
|          | OD8     | ND  | ND      | +    | +    |
|          | OD9     | +   | +       | +    | +    |
|          | OD10    | +   | +       | +    | +    |
|          | OD11    | ND  | -       | -    | -    |
|          | OD12    | ND  | ND      | +    | +    |
| Grupo SD | SD1     | +   | +       | +    | +    |
|          | SD2     | +   | +       | +    | +    |
|          | SD3     | +   | +       | +    | +    |
|          | SD4     | +   | +       | +    | +    |
|          | SD5     | +   | +       | +    | +    |
|          | SD6     | +   | +       | +    | +    |
|          | SD7     | +   | +       | +    | +    |
|          | SD8     | +   | +       | +    | +    |
|          | SD9     | +   | +       | +    | -    |
|          | SD10    | +   | +       | +    | +    |
|          | SD11    | ND  | ND      | +    | +    |
|          | SD12    | +   | +       | +    | +    |
|          | SD13    | +   | +       | +    | +    |

IgG seropositivity of dogs divided into asymptomatic (AD), oligosymptomatic (OD) and symptomatic (SD) CVL, based on the cut-off point established for each antigen. Animals whose optical density was greater than the cutoff point were considered positive (+) and those whose optical density was less than or equal to the cutoff point were considered negative (-). LFT = Lateral flow test based on the rKLi8.3 antigen. ND: Not Done.

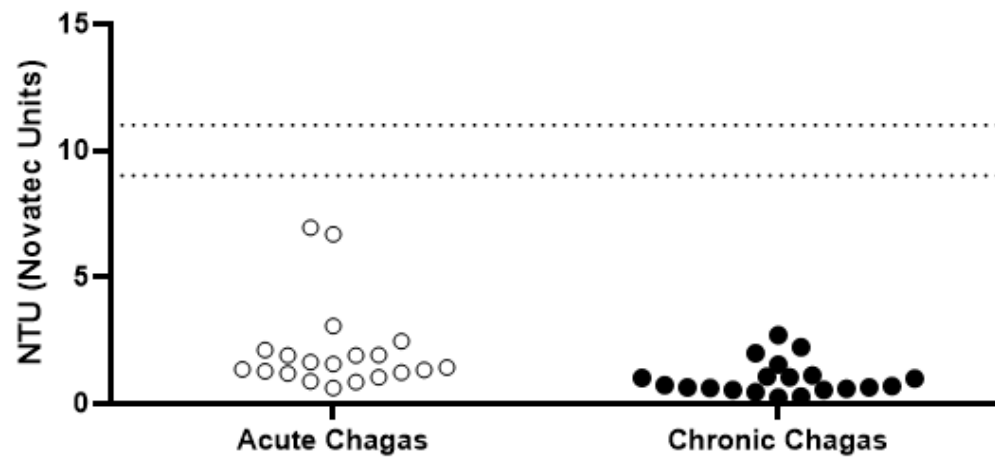

**Supplemental Figure S3.** Sera from *T. cruzi* infected dogs with acute and chronic Chagas disease were tested by rKLi8.3 ELISA.

**Supplemental Table S3.** Comparison of CVL seropositivity by rKLi8.3 based LFT and -ELISA in acute and chronic *T.cruzi* infected dogs.

| Groups         | Animals | LFT | ELISA |
|----------------|---------|-----|-------|
| Acute Chagas   | AC2     | -   | -     |
|                | AC3     | -   | -     |
|                | AC4     | -   | -     |
|                | AC5     | -   | -     |
|                | AC11    | -   | -     |
|                | AC12    | -   | -     |
|                | AC13    | -   | -     |
|                | AC16    | -   | -     |
|                | AC18    | -   | -     |
|                | AC19    | -   | -     |
| Chronic Chagas | CC1     | -   | -     |
|                | CC6     | -   | -     |
|                | CC7     | -   | -     |
|                | CC8     | -   | -     |
|                | CC9     | -   | -     |
|                | CC10    | -   | -     |
|                | CC14    | -   | -     |
|                | CC15    | -   | -     |
|                | CC17    | -   | -     |
|                | CC20    | -   | -     |

IgG seropositivity of dogs divided into acute and chronic Chagas. Animals whose optical density was greater than the cutoff point were considered positive (+) and those whose optical density was less than or equal to the cutoff point were considered negative (-). LFT = Lateral flow test based on the rKLi8.3 antigen.

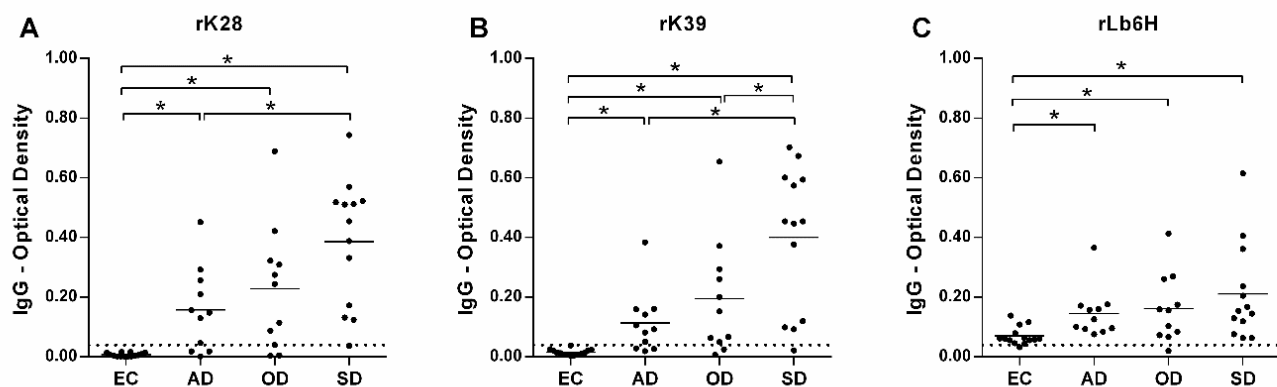

**Supplemental Figure S4.** Comparison of anti-Leishmania antibody responses in rK28- rK39- and rLb6H ELISA using symptomatic (SD), oligosymptomatic (OD), asymptomatic (AD) and endemic control sera from Brazil.

**Supplemental Table S4.** Croatian dog sera tested by lineblot: reactivity with individual antigens are shown.

| Groups | Animals | (native, rKLO8, rK39, rKLi8.3) |
|--------|---------|--------------------------------|
| SD     | 3280    | 1+, 2+, 3+, 4+                 |
|        | 3285    | 1+, 2+, 3+, 4+                 |
|        | 3286    | 1+, 2+, 3+, 4+                 |
|        | 3288    | 1+, 2+, 3+, 4+                 |
|        | 3292    | 1+, 2+, 3+, 4+                 |
|        | 3293    | 1+, 2+, 3+, 4+                 |
|        | 3297    | 1+, 2+, 3+, 4+                 |
|        | 3298    | 1+, 2+, 3+, 4+                 |
|        | 3299    | 1+, 2+, 3+, 4+                 |
|        | 3302    | 1+, 2+, 3+, 4+                 |
|        | 3303    | 1+, 2+, 3+, 4+                 |
|        | 3304    | 1+, 2+, 3+, 4+                 |
|        | 3308    | 1+, 2+, 3+, 4+                 |
|        | 3309    | 1+, 2+, 3+, 4+                 |
|        | 3310    | 1+, 2+, 3+, 4+                 |
|        | 3334    | 1+, 2+, 3+, 4+                 |
|        | 3341    | 1+, 2+, 3+, 4+                 |
|        | 3347    | 1+, 2+, 3+, 4+                 |
|        | 3348    | 1+, 2+, 3+, 4+                 |
|        | 3357    | 1+, 2+, 3+, 4+                 |
|        | 3358    | 1+, 2+, 3+, 4+                 |
| AD     | 3361    | 1+, 2+, 3+, 4+                 |
|        | 3365    | 1+, 2+, 3+, 4+                 |
|        | 3371    | 1+, 2+, 3+, 4+                 |
|        | 3254    | 1-, 2-, 3-, 4-                 |
|        | 3289    | 1+, 2+, 3+, 4+                 |
|        | 3307    | 1+, 2+, 3+, 4+                 |
|        | 3312    | 1+, 2+, 3+, 4+                 |
|        | 3336    | 1+, 2+, 3+, 4+                 |
|        | 3337    | 1+, 2+, 3+, 4+                 |
|        | 3338    | 1+, 2+, 3+, 4+                 |
|        | 3354    | 1w+, 2+, 3+, 4+                |
|        | 3355    | 1+, 2+, 3+, 4+                 |
| EC     | 3356    | 1+, 2+, 3+, 4+                 |
|        | 3364    | 1+, 2w+, 3+, 4+                |
|        | 3368    | 1w+, 2+, 3+, 4+                |
|        | 3373    | 1w+, 2-, 3-, 4-                |
|        | 3375    | 1-, 2-, 3-, 4-                 |
|        | 3377    | 1w+, 2w+, 3+, 4+               |
|        | 3262    | 1w+, 2-, 3-, 4-                |
|        | 3278    | 1w+, 2-, 3-, 4-                |
|        | 3279    | 1w+, 2-, 3-, 4-                |
|        | 3281    | 1w+, 2-, 3-, 4-                |
|        | 3282    | 1-, 2-, 3-, 4-                 |
|        | 3283    | 1-, 2-, 3-, 4-                 |
|        | 3284    | 1-, 2-, 3-, 4-                 |
|        | 3287    | 1-, 2-, 3-, 4-                 |
|        | 3290    | 1w+, 2-, 3-, 4-                |
|        | 3296    | 1w+, 2-, 3-, 4-                |
|        | 3300    | 1w+, 2-, 3-, 4-                |
|        | 3301    | 1+, 2-, 3-, 4-                 |
|        | 3305    | 1w+, 2-, 3-, 4-                |
|        | 3306    | 1w+, 2-, 3-, 4-                |
|        | 3311    | 1w+, 2-, 3-, 4-                |
|        | 3313    | 1-, 2-, 3-, 4-                 |
|        | 3314    | 1-, 2-, 3-, 4-                 |
|        | 3315    | 1w+, 2-, 3-, 4-                |
|        | 3322    | 1w+, 2-, 3-, 4-                |
|        | 3323    | 1-, 2-, 3-, 4-                 |
|        | 3331    | 1-, 2-, 3-, 4-                 |
|        | 3332    | 1w+, 2-, 3-, 4-                |

| Groups | Animals | (native, rKLO8, rK39, rKLi8.3) |
|--------|---------|--------------------------------|
| EC     | 3335    | 1-, 2-, 3-, 4-                 |
|        | 3339    | 1-, 2-, 3-, 4-                 |
|        | 3340    | 1w+, 2-, 3-, 4-                |
|        | 3343    | 1-, 2-, 3-, 4-                 |
|        | 3346    | 1-, 2-, 3-, 4-                 |
|        | 3349    | 1-, 2-, 3-, 4-                 |
|        | 3350    | 1-, 2-, 3-, 4-                 |
|        | 3353    | 1-, 2-, 3-, 4-                 |
|        | 3359    | 1w+, 2-, 3-, 4-                |
|        | 3360    | 1-, 2-, 3-, 4-                 |
|        | 3362    | 1+, 2w+, 3+, 4+                |
|        | 3363    | 1-, 2-, 3-, 4-                 |
|        | 3366    | 1-, 2-, 3-, 4-                 |
|        | 3367    | 1-, 2-, 3-, 4-                 |
|        | 3369    | 1+, 2-, 3-, 4-                 |
|        | 3372    | 1w+, 2-, 3-, 4-                |
|        | 3374    | 1+, 2-, 3-, 4-                 |
|        | 3376    | 1+, 2-, 3-, 4-                 |
|        | 3378    | 1+, 2-, 3+, 4w+                |
|        | 3379    | 1w+, 2-, 3-, 4-                |
|        | 3380    | 1w+, 2-, 3w+, 4-               |
|        | 3381    | 1w+, 2-, 3-, 4-                |
|        | 3382    | 1+, 2-, 3+, 4w+                |
|        | 3294    | 1w+, 2-, 3-, 4-                |
|        | 3295    | 1w+, 2-, 3-, 4-                |
|        | 3317    | 1-, 2-, 3-, 4-                 |
|        | 3318    | 1-, 2-, 3-, 4-                 |
|        | 3320    | 1w+, 2-, 3-, 4-                |
|        | 3344    | 1w+, 2-, 3-, 4-                |
|        | 3345    | 1w+, 2-, 3-, 4-                |



**Supplemental Table S5.** Brazilian dog sera tested by lineblot: reactivity with individual antigens are shown.

| Groups | Animals  | (native, rKLO8, rK39, rKLi8.3) |
|--------|----------|--------------------------------|
| SD     | SD1      | 1w+, 2+, 3+, 4+                |
|        | SD2      | 1+, 2+, 3+, 4+                 |
|        | SD3      | 1+, 2+, 3+, 4+                 |
|        | SD4      | 1+, 2+, 3+, 4+                 |
|        | SD5      | 1+, 2+, 3+, 4+                 |
|        | SD6      | 1+, 2+, 3+, 4w+                |
|        | SD7      | 1+, 2+, 3+, 4+                 |
|        | SD8      | 1+, 2+, 3+, 4+                 |
|        | SD9      | 1+, 2+, 3+, 4+                 |
|        | SD10     | 1+, 2+, 3+, 4+                 |
|        | SD12     | 1+, 2w+, 3+, 4+                |
|        | SD13     | 1+, 2+, 3+, 4+                 |
|        | SD14     | 1+, 2+, 3+, 4+                 |
| AD     | AD1      | 1-, 2-, 3-, 4-                 |
|        | AD2      | 1-, 2-, 3-, 4-                 |
|        | AD3      | 1-, 2-, 3-, 4-                 |
|        | AD4      | 1+, 2+, 3+, 4+                 |
|        | AD5      | 1w+, 2-, 3-, 4-                |
|        | AD6      | 1+, 2+, 3+, 4+                 |
|        | AD7      | 1+, 2w+, 3+, 4+                |
|        | AD8      | 1+, 2+, 3+, 4+                 |
|        | AD9      | 1+, 2+, 3+, 4+                 |
|        | AD10     | 1+, 2w+, 3w+, 4-               |
|        | AD11     | 1+, 2+, 3+, 4+                 |
| OD     | OD1      | 1w+, 2-, 3-, 4-                |
|        | OD2      | 1w+, 2-, 3-, 4-                |
|        | OD3      | 1+, 2+, 3+, 4+                 |
|        | OD4      | 1+, 2+, 3+, 4+                 |
|        | OD5      | 1+, 2+, 3+, 4+                 |
|        | OD6      | 1+, 2+, 3+, 4w+                |
|        | OD8      | 1+, 2+, 3+, 4+                 |
|        | OD9      | 1+, 2+, 3+, 4+                 |
|        | OD10     | 1+, 2+, 3+, 4+                 |
|        | OD11     | 1w+, 2-, 3-, 4-                |
|        | OD12     | 1+, 2+, 3+, 4+                 |
| EC     | SAE1     | 1-, 2-, 3-, 4-                 |
|        | SAE2     | 1-, 2-, 3-, 4-                 |
|        | SAE3     | 1-, 2-, 3-, 4-                 |
|        | SAE4     | 1-, 2-, 3-, 4-                 |
|        | SAE8     | 1-, 2-, 3-, 4-                 |
|        | SAE9     | 1-, 2-, 3-, 4-                 |
|        | SAE10    | 1-, 2-, 3-, 4-                 |
|        | SAE11    | 1-, 2-, 3-, 4-                 |
|        | SAE12    | 1-, 2-, 3-, 4-                 |
|        | SAE13    | 1-, 2-, 3-, 4-                 |
|        | SAE14    | 1-, 2-, 3-, 4-                 |
|        | SAE16    | 1-, 2-, 3-, 4-                 |
| VAC    | LEIVT 01 | 1-, 2-, 3-, 4-                 |
|        | LEIVT 02 | 1-, 2-, 3-, 4-                 |
|        | LEIVT 03 | 1-, 2-, 3-, 4-                 |
|        | LEIVT 04 | 1-, 2-, 3-, 4-                 |
|        | LEIVT 05 | 1-, 2-, 3-, 4-                 |
|        | LEIVT 06 | 1-, 2-, 3-, 4-                 |
|        | LEIVT 07 | 1-, 2-, 3-, 4-                 |
|        | LEIVT 08 | 1-, 2-, 3-, 4-                 |
|        | LEIVT 09 | 1-, 2-, 3-, 4-                 |
|        | LEIVT 10 | 1-, 2-, 3-, 4-                 |

| Groups | Animals  | (native, rKLO8, rK39, rKLi8.3) |
|--------|----------|--------------------------------|
| VAC    | LEIVT 12 | 1-, 2-, 3-, 4-                 |
|        | LEIVT 13 | 1-, 2-, 3-, 4-                 |
|        | LEIVT 14 | 1-, 2-, 3-, 4-                 |
|        | LEIVT 15 | 1-, 2-, 3-, 4-                 |
|        | LEIVT 16 | 1-, 2-, 3-, 4-                 |
